# Supplementary material
Source: PubMed Central journal article supplement (PMC4423375)
Supplement: 10.1534_114.173898_genetics.114.173898-2.pdf [file 10.1534_114.173898_genetics.114.173898-2.pdf]

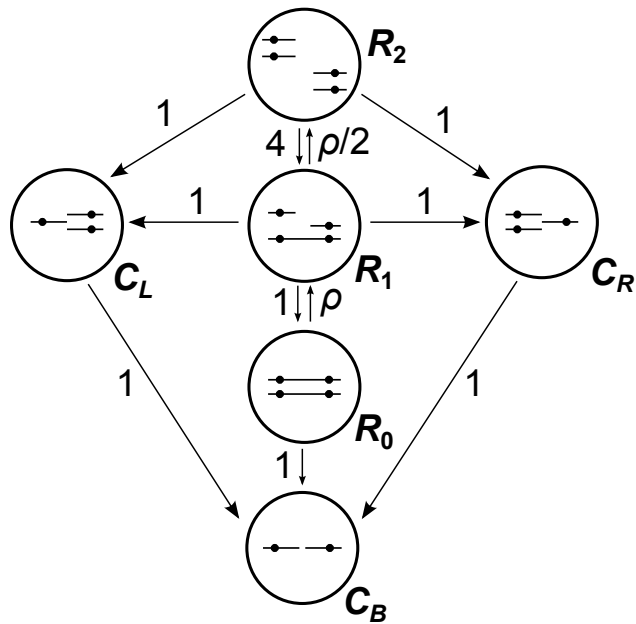

Figure S1: Schematic of the ARG back-in-time Markov process for two loci. The process starts in state  $R_0$ , and transitions to other states occur with the rates indicated by arrows between states.
