# Supplementary material
Source: PubMed Central journal article supplement (PMC4423375)
Supplement: 10.1534_114.173898_genetics.114.173898-3.pdf [file 10.1534_114.173898_genetics.114.173898-3.pdf]

# File S1

## Supporting Information

### Coalescence time distributions at recombination sites

Here, we derive the joint, marginal (i.e., one-locus), and conditional distributions of coalescence times at recombination sites where the coalescence time changes under the ARG, SMC', and SMC. The distributions related to the ARG and SMC' are derived from analysis of the continuous-time Markov chains representing coalescence times at such recombination sites under these models (Figure 7). Under the ARG and SMC', the joint density function of coalescence times at recombination sites that change the coalescence time (i.e., the joint density of  $S$  and  $T$ ) is

$$f_{S,T}(s, t) = \begin{cases} \frac{3}{4} (1 - e^{-2s}) e^{-t} & s < t \\ \frac{3}{4} (1 - e^{-2t}) e^{-s} & s > t, \end{cases} \quad (\text{S1})$$

and the marginal density function of  $S$  (or  $T$ ) is

$$\pi(s) = \frac{3}{8} e^{-s} (2s + 1 - e^{-2s}). \quad (\text{S2})$$

The conditional distribution of  $T$  given  $S$  is

$$f_{T|S}(t|s) = \frac{f_{S,T}(s, t)}{\pi(s)} = \begin{cases} \frac{2(1 - e^{-2t})}{1 - e^{-2s} + 2s} & t < s \\ \frac{2e^{-(t-s)}(1 - e^{-2s})}{1 - e^{-2s} + 2s} & t > s. \end{cases} \quad (\text{S3})$$

Equations (S1), (S2), and (S3) hold marginally at recombination sites where the coalescence time changes under both the ARG and SMC'. Equations (S2) and (S3) were derived for the SMC' by CARMÍ *et al.* (2014, see eqns. (8) and (9), respectively), confirming our derivation.

Under the SMC the process for generating coalescence times at recombination sites is equivalent to the continuous-time Markov chain in Figure 7B with the transition rates from  $\mathbf{R}_1$  to  $\mathbf{C}_L$  and  $\mathbf{C}_R$  equal to 1 instead of  $3/2$ . Under this model for the SMC, the joint density of coalescence times on either side of a recombination event is

$$f_{S,T}(s, t) = \begin{cases} e^{-t}(1 - e^{-s}) & s < t \\ e^{-s}(1 - e^{-t}) & s > t \end{cases} \quad (\text{S4})$$

and the marginal density of  $S$  (or  $T$ ) is

$$\pi(s) = s e^{-s}. \quad (\text{S5})$$

The conditional distribution of  $T$  given  $S$  under the SMC is

$$f_{T|S}(t|s) = \frac{f_{S,T}(s, t)}{\pi(s)} = \begin{cases} \frac{1 - e^{-t}}{s} & t < s \\ \frac{e^{-(t-s)}(1 - e^{-s})}{s} & t > s, \end{cases} \quad (\text{S6})$$

which confirms the derivation of LI and DURBIN (2011, cf. their Eq. (S6)).

### Pairwise ARG is ergodic

Here we show that the pairwise ARG is sequentially ergodic. Let  $\{t(x)\}_{x \geq 0}$  represent the random pairwise coalescence time at point  $x$  along two aligned, continuous, infinitely-long chromosomes modeled by the ARG. Let time be scaled such that the marginal distribution of  $t(x)$  is exponential with rate 1 for all  $x \geq 0$ , and thus  $E[t(x)] = 1$ . Let the distance across the chromosome be measured such that a segment of length  $l$

recombines apart back in time at rate  $l/2$ . (Equivalently, a recombination event happens in the chromosome interval  $(x, x + dx)$  in the time interval  $(t, t + dt)$  with infinitesimal probability  $dx dt$ .)

One useful property of  $t(x)$  is that it is strongly stationary. That is, the joint distribution of  $\{t(x)\}_{a \leq x \leq b}$  is the same as the joint distribution of  $\{t(x)\}_{a+h \leq x \leq b+h}$  for all  $0 \leq a < b$  and  $h > 0$ . To see that this is the case, consider the WIUF and HEIN (1999) algorithm for constructing an ARG sequentially across the chromosome: at a given point, a genealogy is drawn from the marginal distribution of genealogies, and then the algorithm proceeds along the chromosome generating recombination events and genealogies, where at each point along the chromosome, such events are drawn from the conditional distribution given all previous coalescence and recombination events. The initial point from which the marginal genealogy is drawn has no effect on the resulting joint distribution of genealogies.

A stationary process  $t(x)$  is ergodic if the covariance function  $r(x)$  converges to zero as  $x$  goes to infinity (KARLIN and TAYLOR, 1975). Under the ARG, the covariance function is

$$r(x) = \frac{x + 18}{x^2 + 13x + 18}, \quad (\text{S7})$$

which satisfies this condition. Thus the pairwise ARG is sequentially ergodic: the mean coalescence time across a long chromosome converges to the mean coalescence time at a single point. A similar proof could be given for the discrete-locus ARG with evenly spaced loci, which has a covariance function of the same form as the continuous-chromosome ARG.
